# Supplementary material for: Association between Optic Neuritis and Inflammatory Bowel Disease: A Population-Based Study
Source: PubMed Central journal article supplement (PMC7916645; doi:10.3390/jcm10040688), 2021-02-10
Supplement: jcm-10-00688-s001.pdf [file jcm-10-00688-s001.pdf]

Supplementary Table S1. ICD-9-CM and definition used in this study.

|                                      | ICD-9-CM/Definition |
|--------------------------------------|---------------------|
| <b>IBD</b>                           |                     |
| Crohn's disease                      | 555                 |
| Ulcerative colitis                   | 556                 |
| <b>Excluding</b>                     |                     |
| Tuberculosis                         | 017-018             |
| Lyme disease                         | 088.81              |
| Syphilis                             | 090-097, 647.0      |
| Herpes zoster ophthalmicus           | 053.22, 053.29      |
| <b>Optic neuritis</b>                |                     |
| Optic neuritis, unspecified          | Any of the listed   |
| Optic papillitis                     | 377.30              |
| Retrobular neuritis (acute)          | 377.31              |
| Other optic neuritis                 | 377.32              |
|                                      | 377.39              |
| <b>Comorbidities</b>                 |                     |
|                                      | Study period        |
| Multiple sclerosis                   | 340                 |
| Neuromyelitis optica                 | 341.0               |
| Acute disseminated encephalomyelitis | 323.61              |
| Sarcoidosis                          | 135                 |
| SLE                                  | 710.0               |
| Behçet syndrome                      | 136.1, 711.2        |
| Antiphospholipid antibody syndrome   | 286.53              |
| Granulomatosis with polyangiitis     | 446.4               |
| Sicca syndrome                       | 710.2               |

**IBD: inflammatory bowel disease, OPD: outpatient department, SLE: systemic lupus erythematosus, TNF: tumor necrosis factor.**
